# Supplementary material
Source: Springer Nature journal article supplement (https://www.springermedizin.de/resource/supplementary/12904_2007_41_MOESM1_ESM.pdf/9518008)
Supplement: MOESM1 [file 9518008]

*Context.* Bradford is the 5<sup>th</sup> largest Metropolitan Borough in the UK and 8<sup>th</sup> most deprived health community. The hospice at home team covered 3 of the city's 4 Primary Care Trusts (PCT's) with a combined population of 386,000. The service was set up with New Opportunity Fund money from the government matched by local primary care funding. It was to provide support to people with a prognosis of six weeks or less, regardless of diagnosis. The service was to provide practical nursing support, supplementing that provided by the patient's own nursing team, who remained the key workers.

*Number of staff / skill mix:* Sister (1); Staff Nurses (2) Health Care Assistants (all Marie Curie trained)(6) Agency staff supplemented the core team – in order, they are recruited from: Marie Curie; Home Nursing Service; Rapid Response service; community nursing pools; private nursing agencies.
